# Supplementary material for: A single-ligand-protected Eu60−nGd(Tb)n cluster: a reasonable new approach to expand lanthanide aggregations
Source: Royal Society of Chemistry journal article supplement (doi:10.1039/d0qi00226g), 2020-01-01
Supplement: d0qi00226g1.pdf [file d0qi00226g1.pdf]

## Supporting Information

### A Single-Ligand-Protected $\text{Eu}_{60-n}\text{Gd}(\text{Tb})_n$ Cluster: A Reasonable New Approach to Expand Lanthanide Aggregations

Xi-Ming Luo,<sup>a,#</sup> Ning-Fang Li,<sup>a,#</sup> Qing-Fang Lin,<sup>a</sup> Jia-Peng Cao,<sup>a</sup> Peng Yuan,<sup>a</sup> and Yan Xu<sup>\*, a</sup>

<sup>a</sup>College of Chemical Engineering, State Key Laboratory of Materials-Oriented Chemical Engineering, Nanjing Tech University, Nanjing 210009, P. R. China. E-mail: [yanxu@njtech.edu.cn](mailto:yanxu@njtech.edu.cn)

# Content

|                                                                                         |           |
|-----------------------------------------------------------------------------------------|-----------|
| <b>Section 1. Crystal Synthesis .....</b>                                               | <b>3</b>  |
| <b>Section 2. Crystal Structures .....</b>                                              | <b>4</b>  |
| <b>The morphology of compounds mixed-Ln<sub>60</sub> and Gd<sub>60</sub> .....</b>      | <b>4</b>  |
| <b>Crystal structure figures .....</b>                                                  | <b>5</b>  |
| <b>Section 3. Characterizations .....</b>                                               | <b>7</b>  |
| <b>PXRD .....</b>                                                                       | <b>7</b>  |
| <b>IR.....</b>                                                                          | <b>9</b>  |
| <b>TGA .....</b>                                                                        | <b>11</b> |
| <b>EDS .....</b>                                                                        | <b>13</b> |
| <b>XRF .....</b>                                                                        | <b>15</b> |
| <b>ICP .....</b>                                                                        | <b>16</b> |
| <b>Section 4. Luminescence properties .....</b>                                         | <b>17</b> |
| <b>Section 5. The calculated energy of compound Eu<sub>52.7</sub>Gd<sub>7.3</sub>..</b> | <b>19</b> |
| <b>Section 6. Stability .....</b>                                                       | <b>20</b> |
| <b>Section 7. Tables .....</b>                                                          | <b>22</b> |
| <b>Supplementary References .....</b>                                                   | <b>31</b> |

## Section 1. Crystal Synthesis

Scheme S1. Wrong Synthetic Route for mixed-Ln<sub>60</sub>

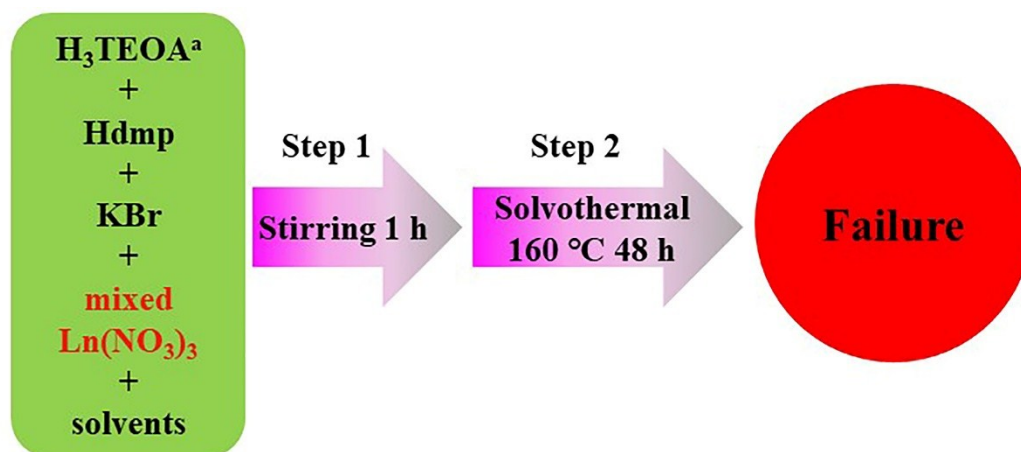

### Synthetic discussion:

The order of mixing procedure is important to successful synthesis. The mixtures (Hdmp, KBr, H<sub>3</sub>TEOA, methanol, acetonitrile and deionized water) were stirred 1 h until forming clarifying solution. Then adding the lanthanide salts, and a subsequent solvent-thermal process was performed to finally obtain the target crystal product.

If all reactants were simultaneously mixed and stirred, the crystals will not appear and only clear liquid will produce.

## Section 2. Crystal Structures

The morphology of compounds mixed-Ln<sub>60</sub> and Gd<sub>60</sub>

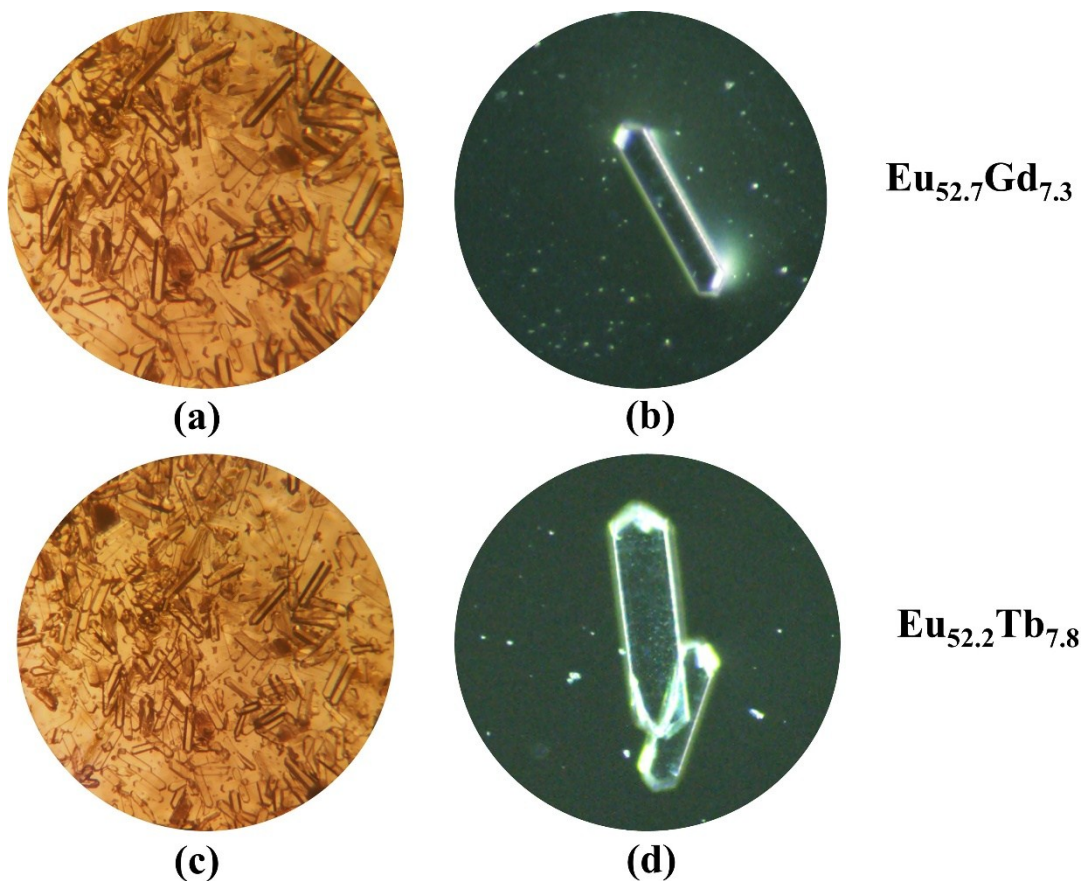

Figure S1. The morphology of compounds  $\text{Eu}_{52.7}\text{Gd}_{7.3}$  (a), (b), and  $\text{Eu}_{52.2}\text{Tb}_{7.8}$  (c), (d).

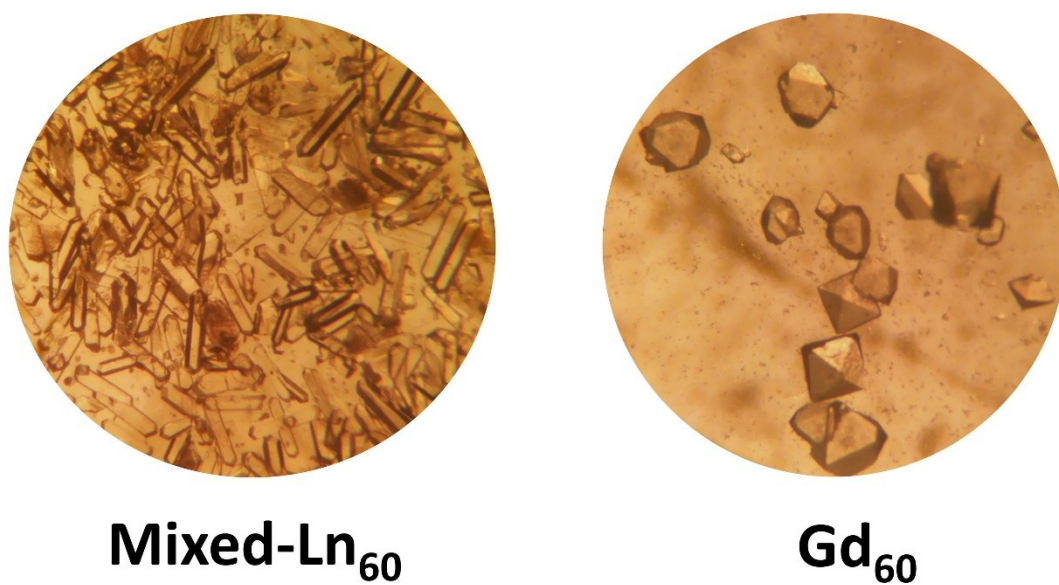

**Figure S2.** The morphology of compounds **mixed-Ln<sub>60</sub>** (left) and **Gd<sub>60</sub>(1)** (right).

## Crystal structure figures

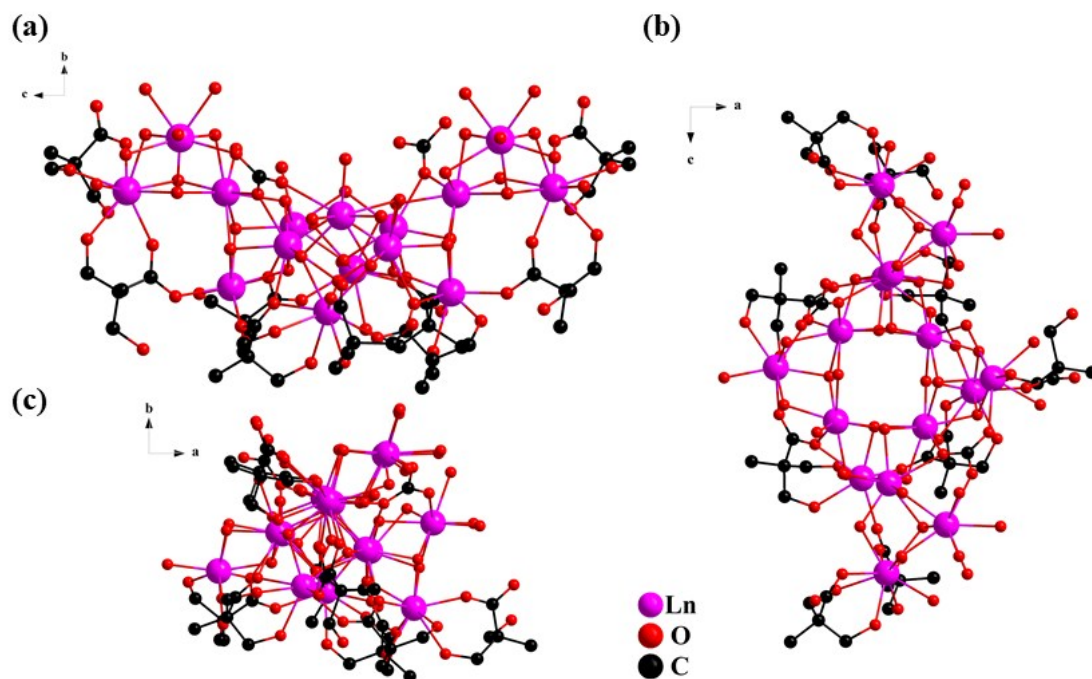

**Figure S3.** Ball-and-stick view of the asymmetric unit of **mixed-Ln<sub>60</sub>** (a), (b), (c).

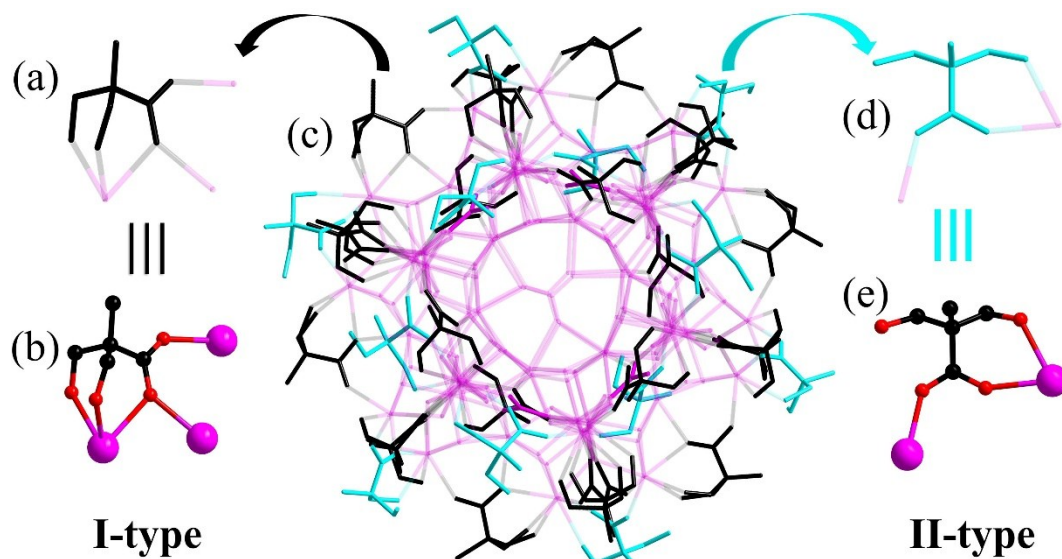

**Figure S4.** The coordination modes of L ligand (a), (b), (d), (e); the unit of compound **mixed-Ln<sub>60</sub>** (c).



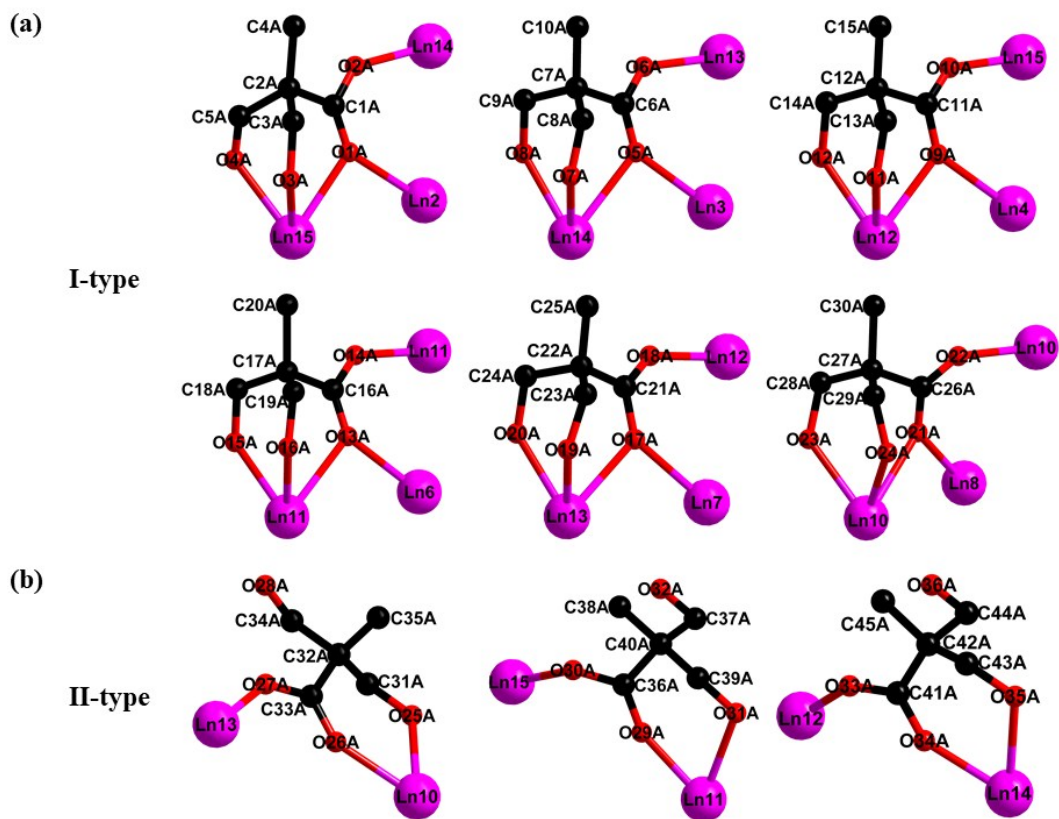

**Figure S5.** The coordination modes of L ligand (a), (b).

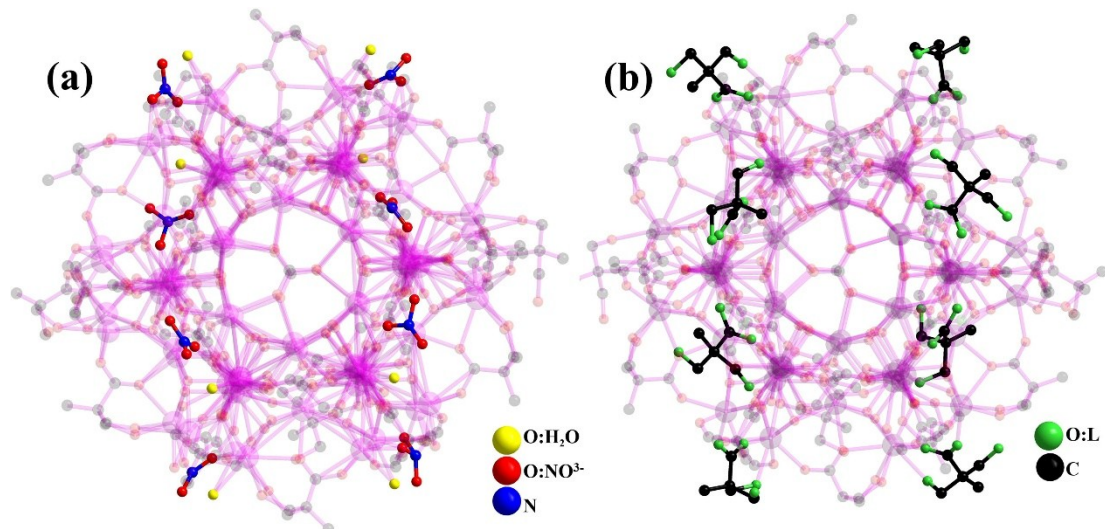

**Figure S6.** The view of Gd<sub>60</sub>(2) (a); mixed-Ln<sub>60</sub> (b).

### Section 3. Characterizations

#### PXRD

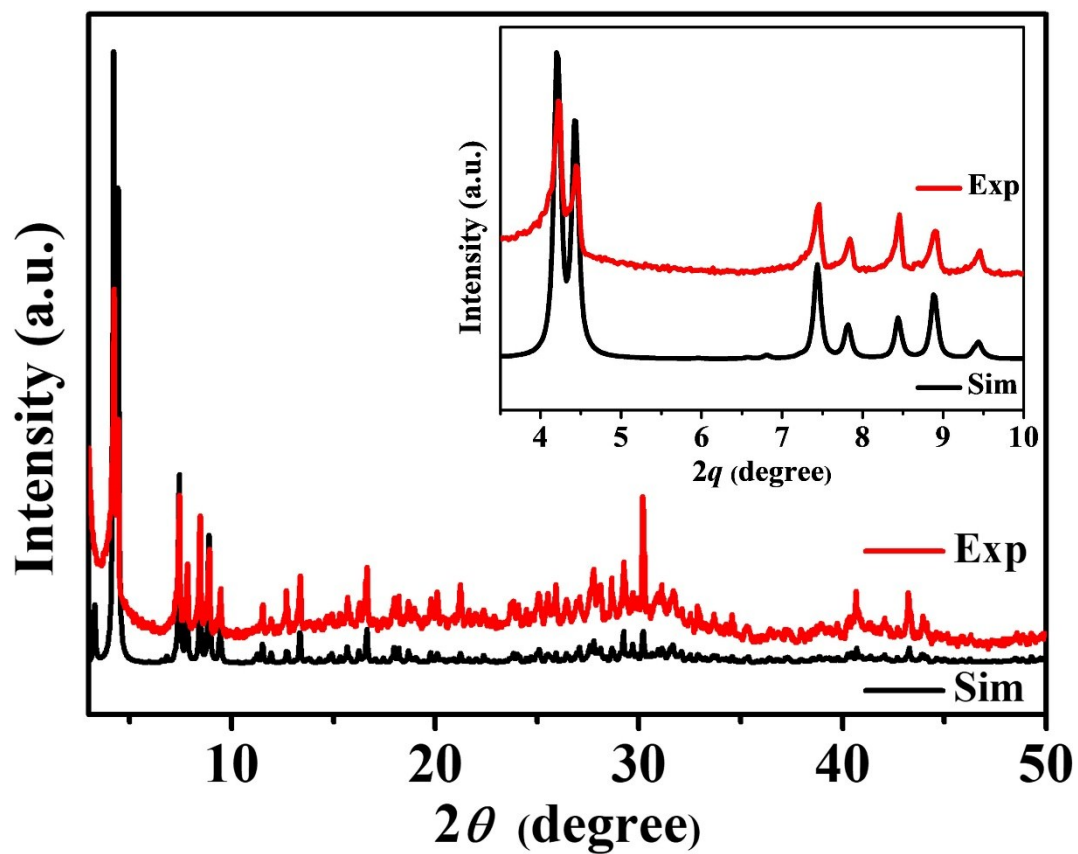

Figure S7. The simulated and experimental PXRD patterns of  $\text{Eu}_{52.7}\text{Gd}_{7.3}$ .



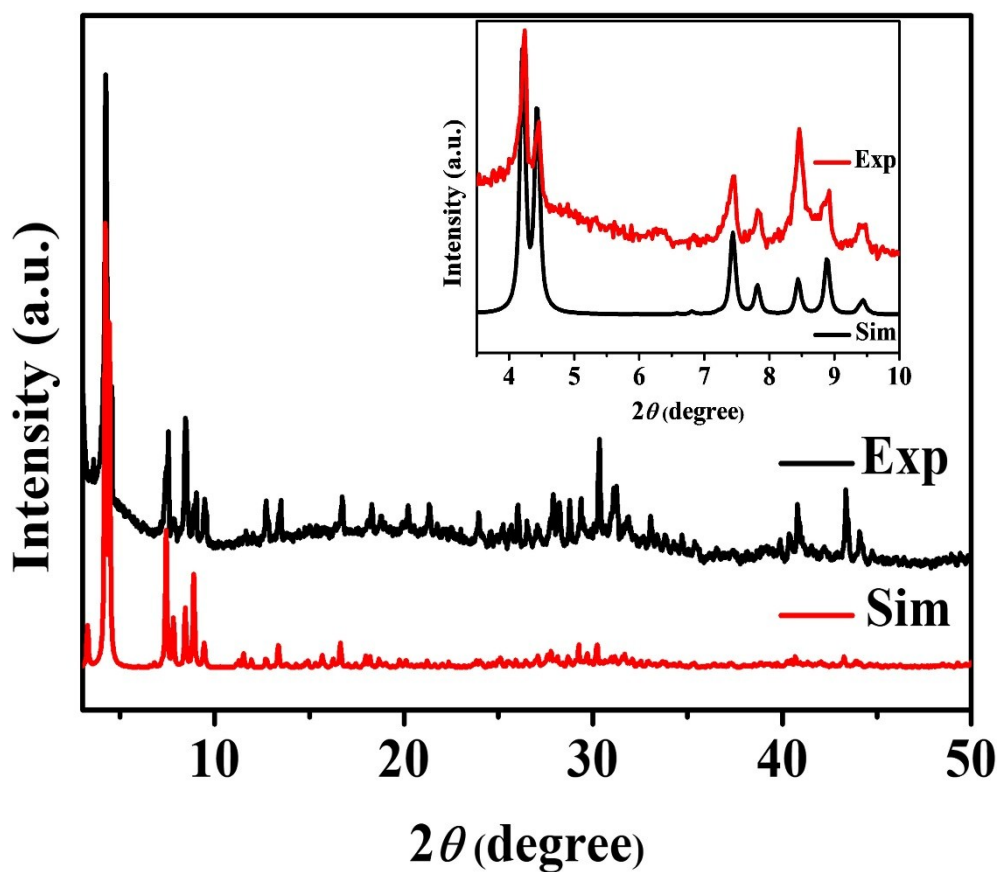

**Figure S8.** The simulated and experimental PXRD patterns of  $\text{Eu}_{52.2}\text{Tb}_{7.8}$ .

As shown on Fig. S7-8, the PXRD of the samples have the same pattern as those of the simulated based on structural information, indicating that those compounds are pure materials.

IR

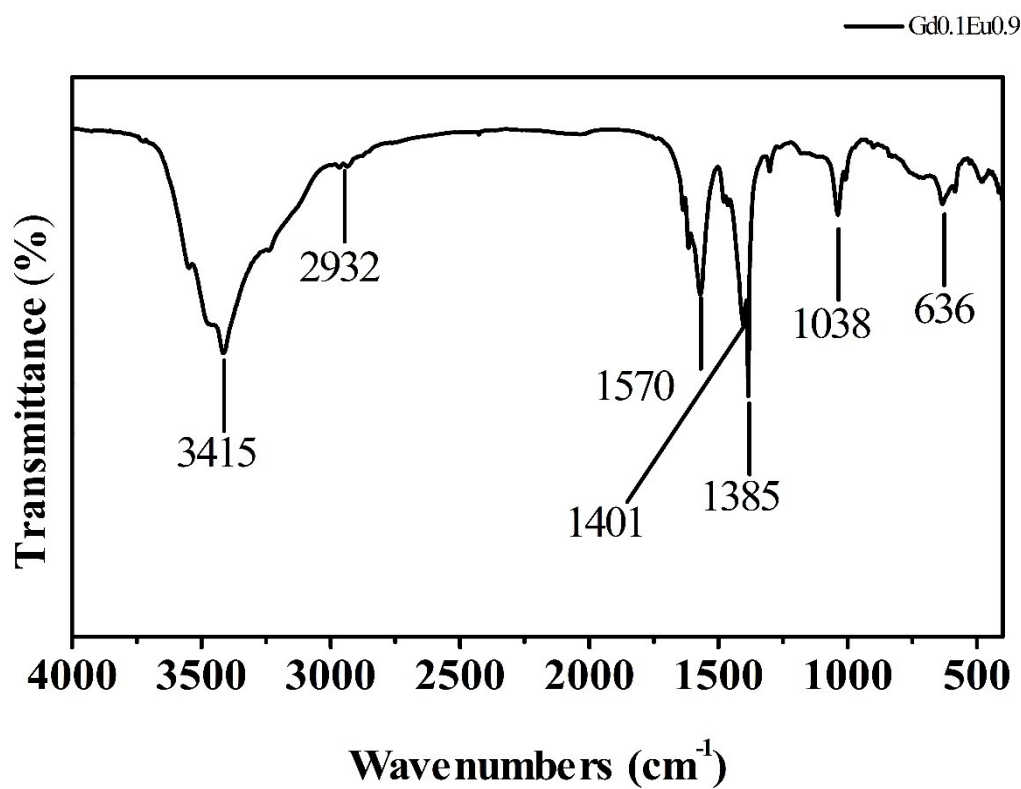

Figure S9. FT-IR spectra of Eu<sub>52.7</sub>Gd<sub>7.3</sub>.

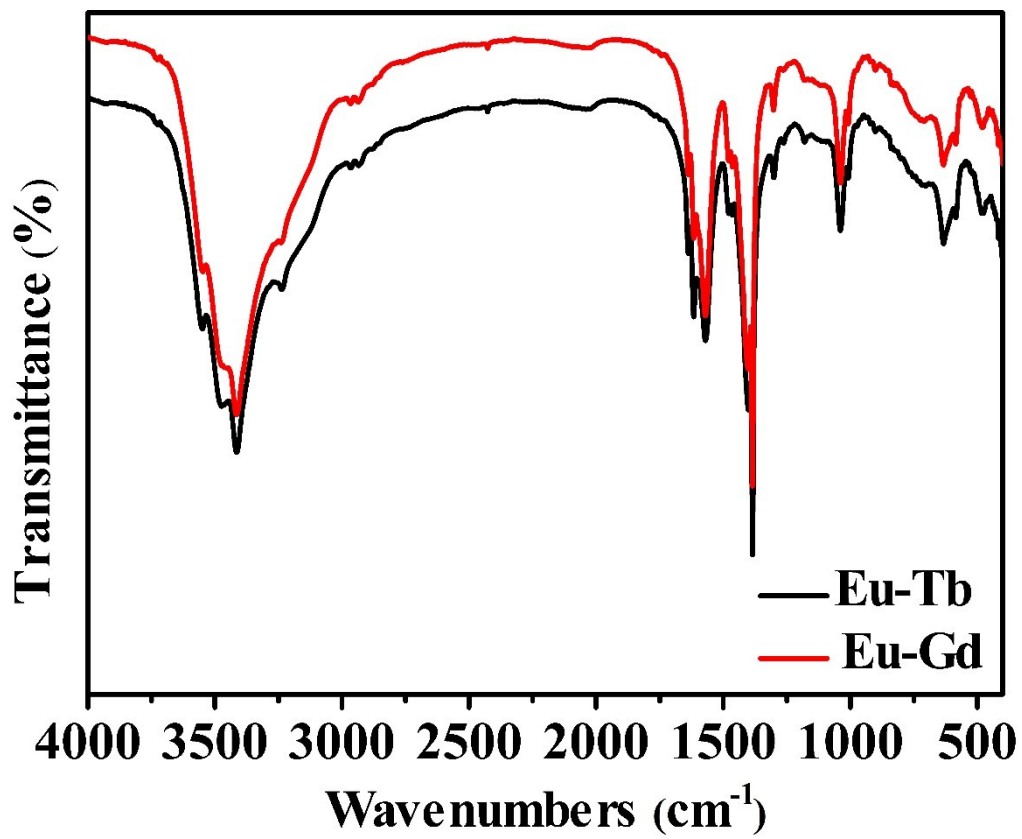

Figure S10. FT-IR spectra of  $\text{Eu}_{52.7}\text{Gd}_{7.3}$  and  $\text{Eu}_{52.2}\text{Tb}_{7.8}$ .

## TGA

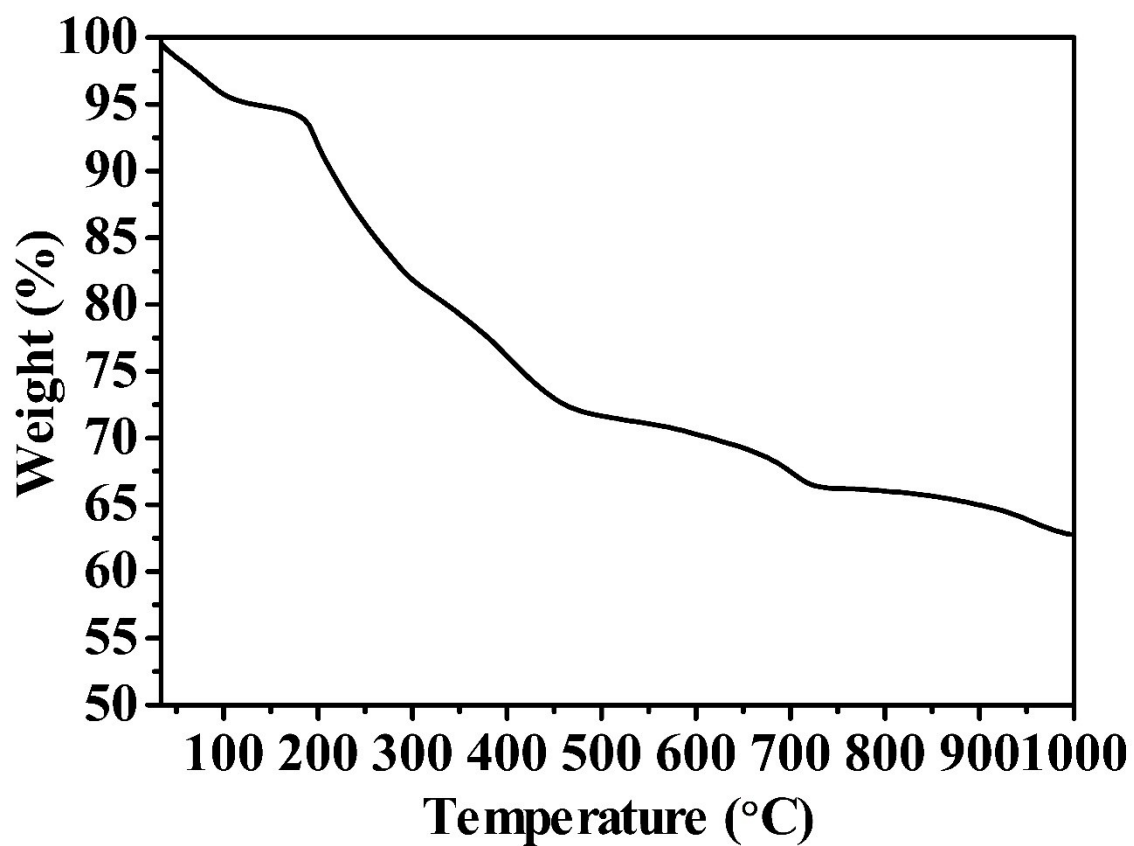

Figure S11. The TG measurement of  $\text{Eu}_{52.7}\text{Gd}_{7.3}$ .

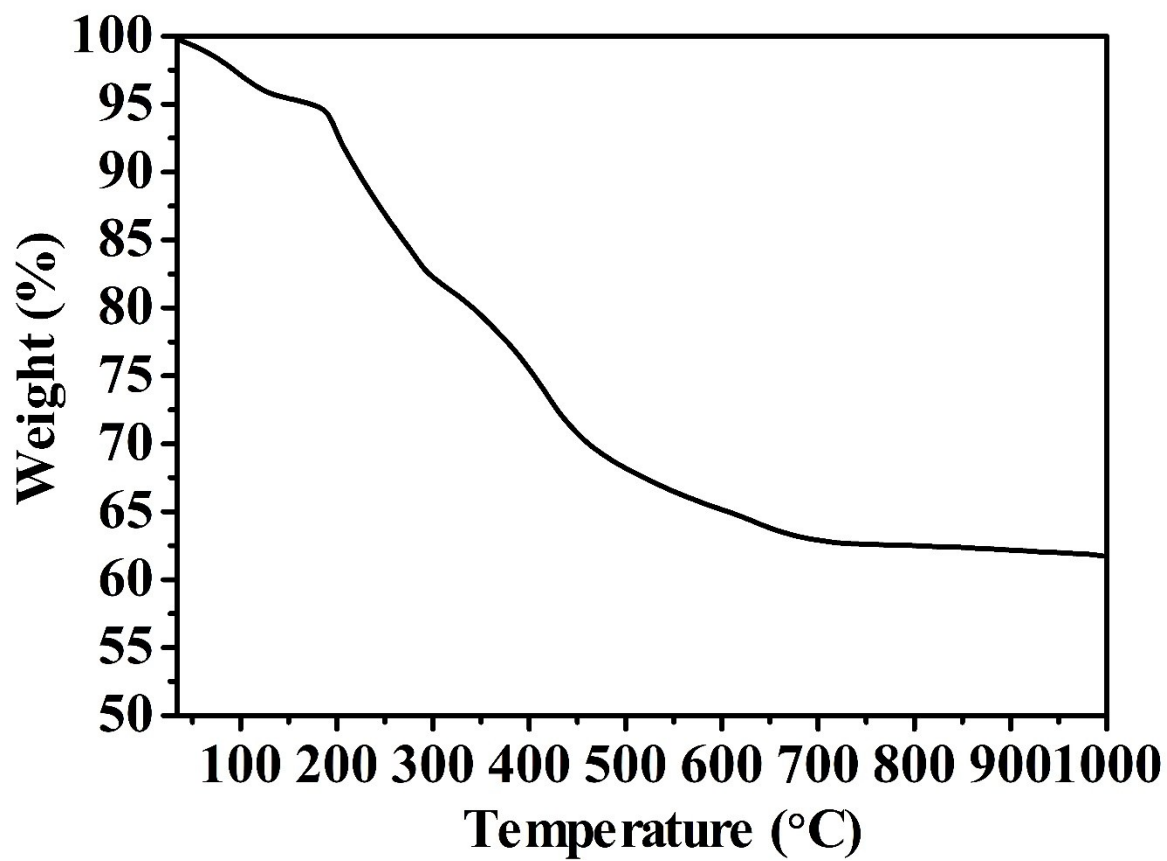

Figure S12. The TG measurement of  $\text{Eu}_{52.2}\text{Tb}_{7.8}$ .

## EDS

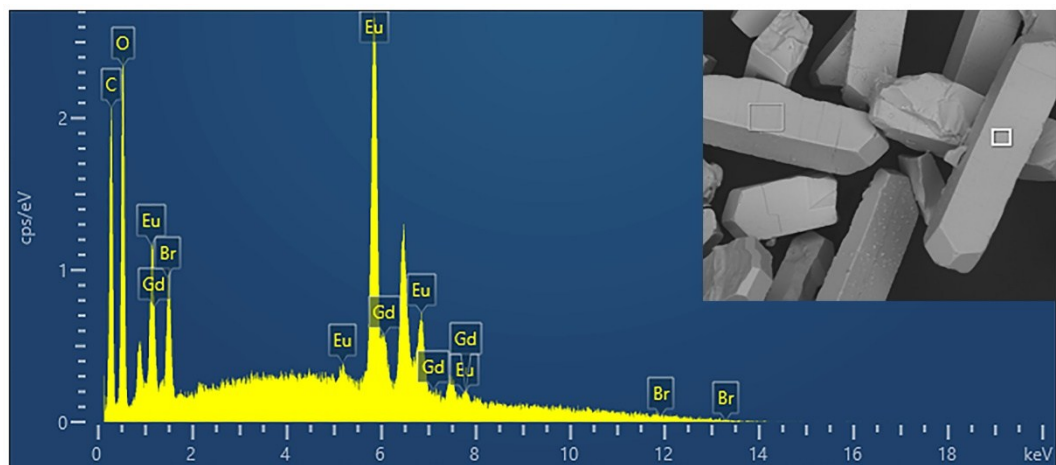

**Figure S13.** The EDS measurement of  $\text{Eu}_{52.7}\text{Gd}_{7.3}$ .

**Table S1.** The C, N, O, Br, Eu and Gd components of  $\text{Eu}_{52.7}\text{Gd}_{7.3}$  recorded from the EDX quantitative analyses.

| Element | Percentage by weight / % |
|---------|--------------------------|
| C       | 13.96                    |
| Br      | 5.25                     |
| O       | 32.59                    |
| Eu      | 42.49                    |
| Gd      | 6.28                     |

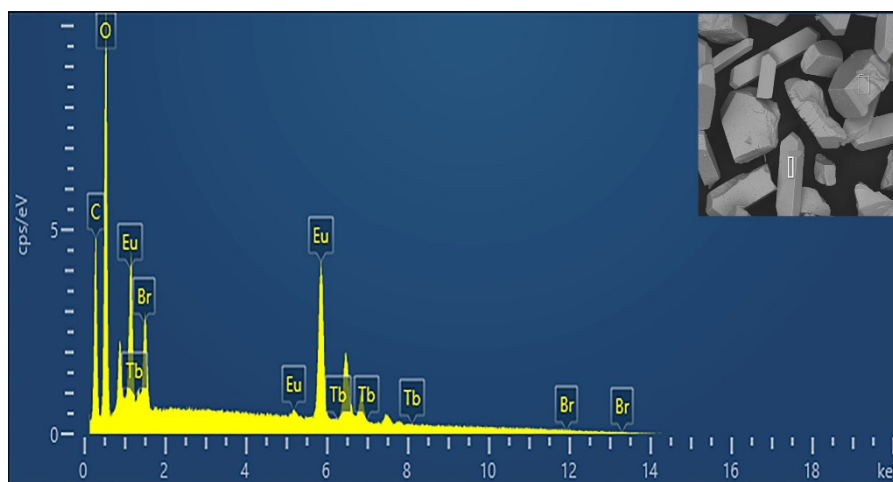

**Figure S14.** The EDS measurement of  $\text{Eu}_{52.2}\text{Tb}_{7.8}$ .

**Table S2.** The C, N, O, Br, Eu and Tb components of  $\text{Eu}_{52.2}\text{Tb}_{7.8}$  recorded from the EDX quantitative analyses.

| Element | Percentage by weight / % |
|---------|--------------------------|
| C       | 13.96                    |
| Br      | 6.98                     |
| O       | 29.47                    |
| Eu      | 42.35                    |
| Tb      | 7.24                     |

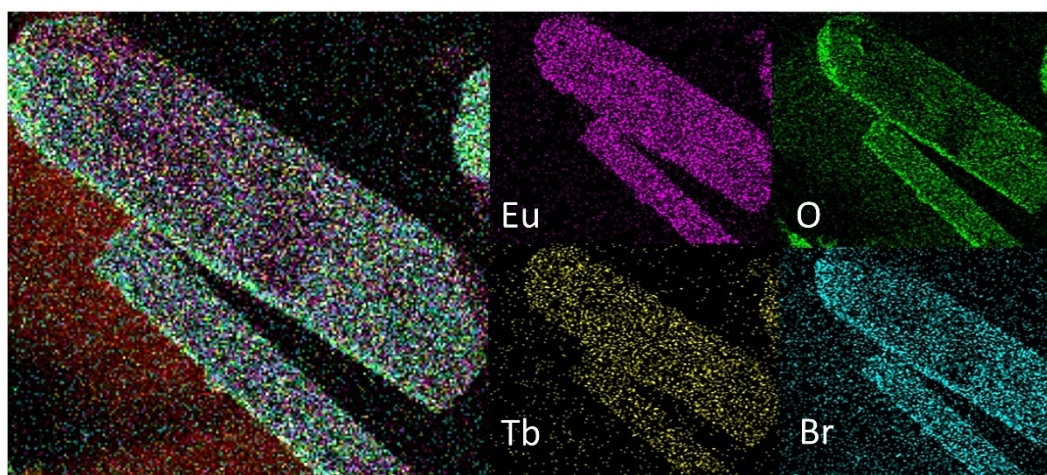

**Figure S15.** The SEM-EDS mapping of compounds  $\text{Eu}_{52.2}\text{Tb}_{7.8}$ .



## XRF

**Table S3.** The C, N, O, Br, Eu and Gd components of  $\text{Eu}_{52.7}\text{Gd}_{7.3}$  recorded from the XRF quantitative analyses.

| Component | mass %  | LOD (limit of detection) | intensity |
|-----------|---------|--------------------------|-----------|
| C         | 13.2854 | 0.10524                  | 12.6033   |
| N         | 0.7155  | 0.50248                  | 0.0565    |
| O         | 31.4430 | 0.93224                  | 0.5591    |
| Br        | 5.2397  | 0.00605                  | 287.5566  |
| Eu        | 43.0461 | 0.0328                   | 185.0066  |
| Gd        | 6.2703  | 0.03189                  | 28.2619   |

**Table S4.** The C, N, O, Br, Eu and Tb components of  $\text{Eu}_{52.2}\text{Tb}_{7.8}$  recorded from the XRF quantitative analyses.

| Component | mass %  | LOD (limit of detection) | intensity |
|-----------|---------|--------------------------|-----------|
| C         | 12.1272 | 0.10184                  | 11.9055   |
| N         | 0.5049  | 0.47353                  | 0.087     |
| O         | 30.5844 | 0.87293                  | 0.5161    |
| Br        | 6.3886  | 0.00548                  | 339.6892  |
| Eu        | 43.1428 | 0.05777                  | 184.7422  |
| Tb        | 7.1462  | 0.03495                  | 41.8983   |

## ICP

**Table S5.** The Eu and Gd components of **Eu<sub>52.7</sub>Gd<sub>7.3</sub>** recorded from the ICP quantitative analyses.

| Compound                           | Eu<br>(ppm) | Gd<br>(ppm) | Eu<br>( $\mu\text{mol} / \text{mL}$ ) | Gd<br>( $\mu\text{mol} / \text{mL}$ ) | Eu<br>Percentage by<br>weight / % | Gd<br>Percentage by<br>weight / % | Gd:Eu<br>(mol %) |
|------------------------------------|-------------|-------------|---------------------------------------|---------------------------------------|-----------------------------------|-----------------------------------|------------------|
| Eu <sub>x</sub> Gd <sub>60-x</sub> | 7.73        | 1.11        | $5.09 \times 10^{-2}$                 | $7.05 \times 10^{-3}$                 | 42.7                              | 6.13                              | 13.85            |

**Table S6.** The Eu and Tb components of **Eu<sub>52.2</sub>Tb<sub>7.8</sub>** recorded from the ICP quantitative analyses.

| Compound                           | Eu<br>(ppm) | Tb<br>(ppm) | Eu<br>( $\mu\text{mol} / \text{mL}$ ) | Tb<br>( $\mu\text{mol} / \text{mL}$ ) | Eu<br>Percentage by<br>weight / % | Tb<br>Percentage by<br>weight / % | Tb:Eu<br>(mol %) |
|------------------------------------|-------------|-------------|---------------------------------------|---------------------------------------|-----------------------------------|-----------------------------------|------------------|
| Eu <sub>x</sub> Gd <sub>60-x</sub> | 7.40        | 1.16        | $4.87 \times 10^{-2}$                 | $7.30 \times 10^{-3}$                 | 42.53                             | 6.67                              | 14.99            |

## Section 4. Luminescence properties

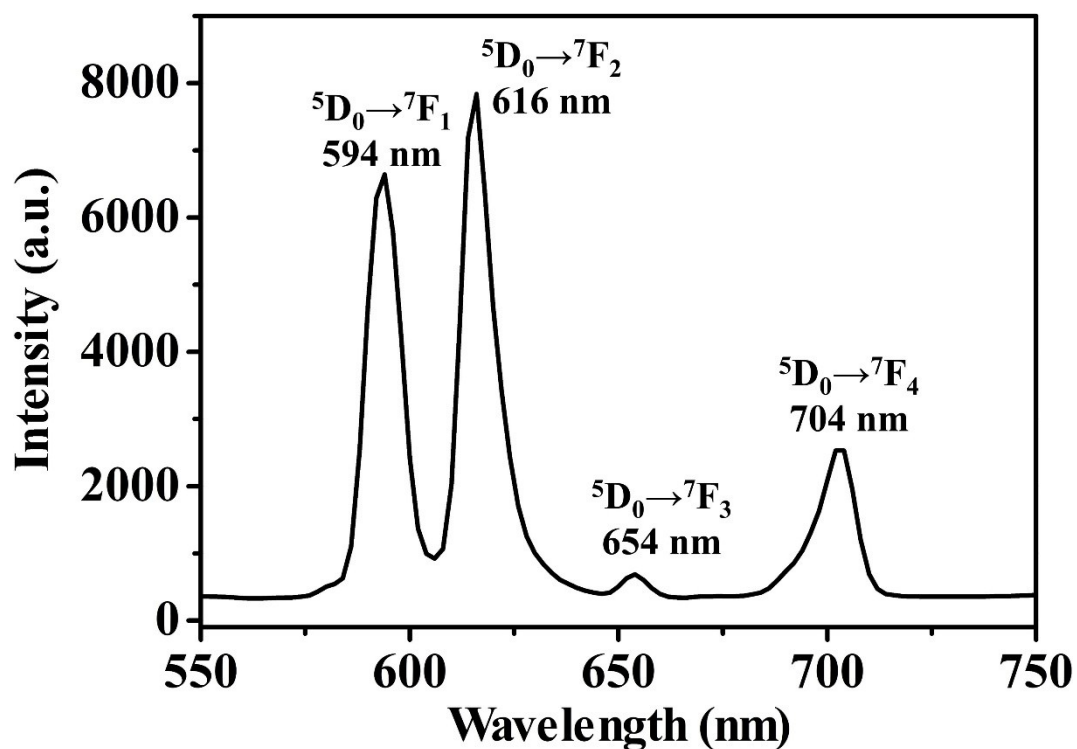

Figure S16. Emission spectra of compound  $\text{Eu}_{52.7}\text{Gd}_{7.3}$ .

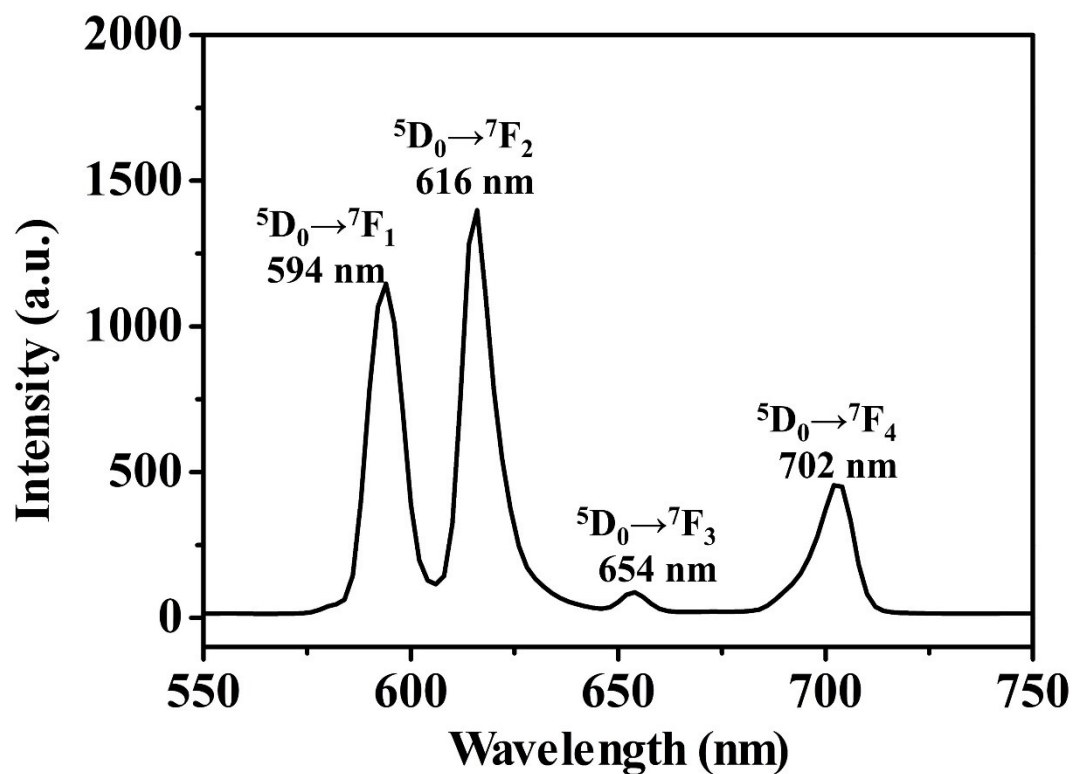

Figure S17. Emission spectra of compound  $\text{Eu}_{52.2}\text{Tb}_{7.8}$ .

Due to the excellent luminescent properties of  $\text{Eu}^{\text{III}}$ , herein compounds  $\text{Eu}_{52.7}\text{Gd}_{7.3}$  and  $\text{Eu}_{52.2}\text{Tb}_{7.8}$  were investigated. The luminescence spectra of compounds  $\text{Eu}_{52.7}\text{Gd}_{7.3}$  and  $\text{Eu}_{52.2}\text{Tb}_{7.8}$  are shown in Fig. S16-17. Here only compound  $\text{Eu}_{52.7}\text{Gd}_{7.3}$  was discussed in detail, owing to similar luminescent properties of  $\text{Eu}_{52.7}\text{Gd}_{7.3}$  and  $\text{Eu}_{52.2}\text{Tb}_{7.8}$ .

The luminescent property of  $\text{Eu}_{52.7}\text{Gd}_{7.3}$  was measured with the characteristic f-f transition of an  $\text{Eu}^{\text{III}}$  ion on excitation at 394 nm (Fig. S16).<sup>1-3</sup> Major emission peaks at 594, 616, 654, 704 nm are ascribed to characteristic emissions arising from the  $^5\text{D}_0 \rightarrow ^7\text{F}_j$  ( $j = 1,2,3,4$ ) transition. The strongest intensity at 616 nm corresponds to electric dipolar  $^5\text{D}_0 \rightarrow ^7\text{F}_2$ . Correspondingly, the medium intensity peak at 592 nm is due to magnetic dipolar  $^5\text{D}_0 \rightarrow ^7\text{F}_1$ , which hardly varies with the coordination environment. The remaining two peaks at 653 and 696 nm pertain to the  $^5\text{D}_0 \rightarrow ^7\text{F}_3$  and  $^5\text{D}_0 \rightarrow ^7\text{F}_4$  transitions, respectively.<sup>1-3</sup>

## Section 5. The calculated energy of compound $\text{Eu}_{52.7}\text{Gd}_{7.3}$ .

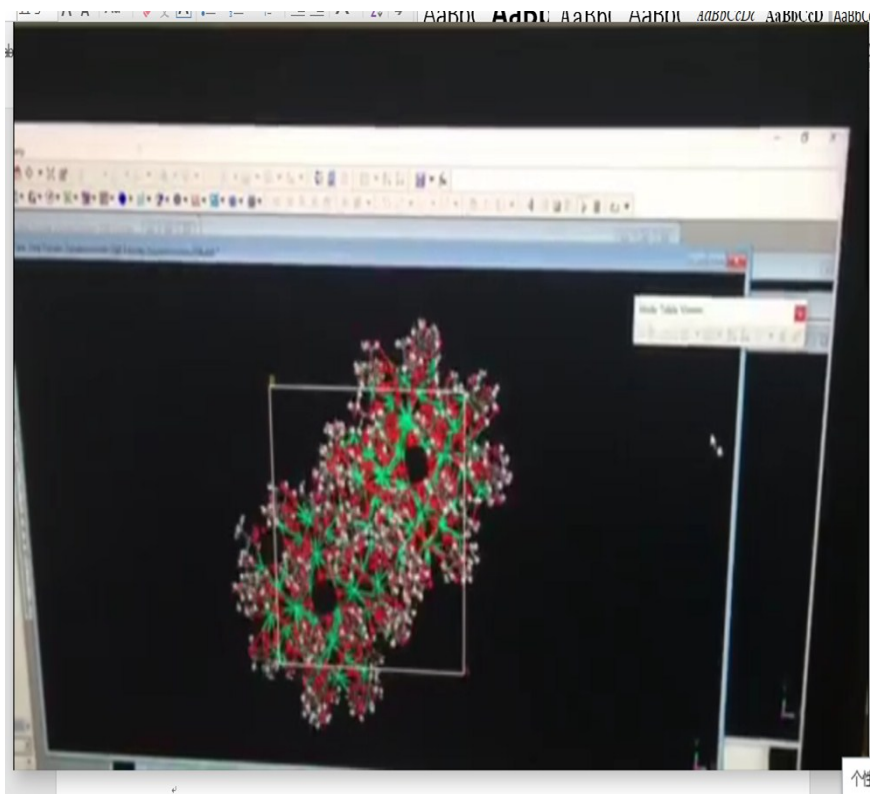

```
----- Initial structure -----  
Total enthalpy           : 24.007637 kcal/mol  
External pressure term   : 0.000000 kcal/mol  
  
Total energy             :                24.007637 kcal/mol  
  
Contributions to total energy (kcal/mol):  
Valence energy (diag. terms) :      11.821  
Bond                       :         2.416  
Angle                      :        12.096  
Torsion                    :        -2.691  
Inversion                  :         0.080  
Valence energy (cross terms) :        -0.940  
Stretch-Stretch           :         0.080  
Stretch-Bend-Stretch      :         0.174  
Stretch-Torsion-Stretch   :        -0.494  
Separated-Stretch-Stretch :         0.000  
Torsion-Stretch           :         0.385  
Bend-Bend                 :         0.004  
Torsion-Bend-Bend         :        -0.513  
Bend-Torsion-Bend         :        -0.576  
Non-bond energy           :        13.127  
van der Waals             :        13.128  
Long range correction     :        -0.001  
Electrostatic              :         0.000
```

Figure S18. The calculated energy of compound  $\text{Eu}_{52.7}\text{Gd}_{7.3}$ .

## Section 6. Stability

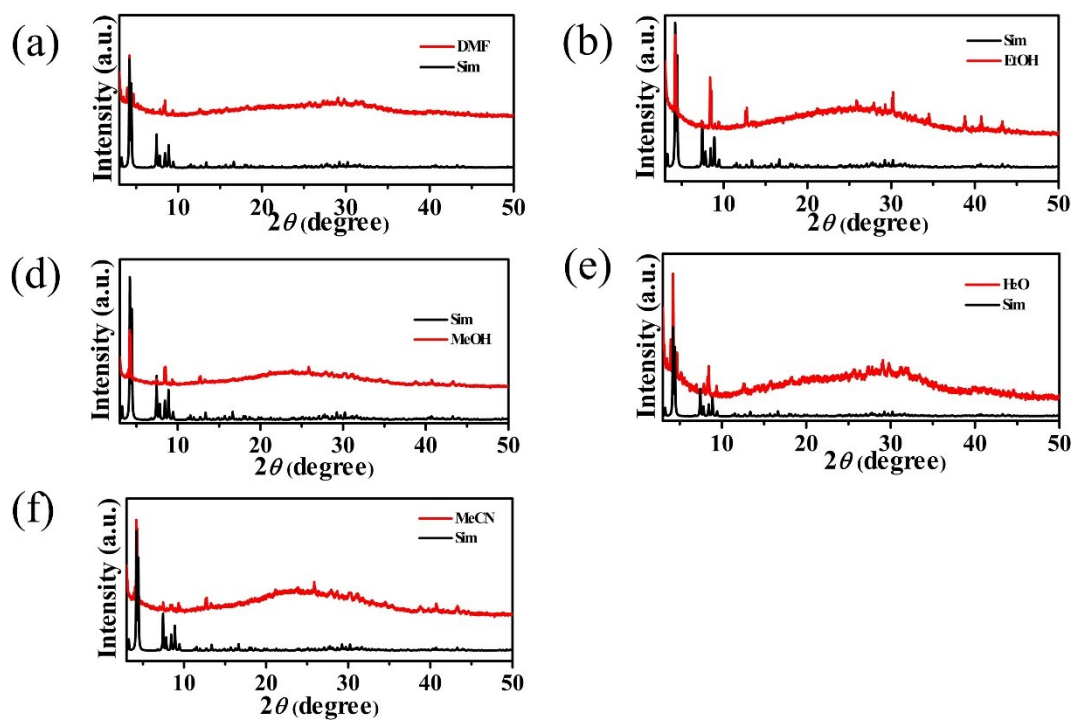

**Figure S19.** Stability of as-synthesized compound  $\text{Eu}_{52.7}\text{Gd}_{7.3}$  in different solvent checked by PXRD.

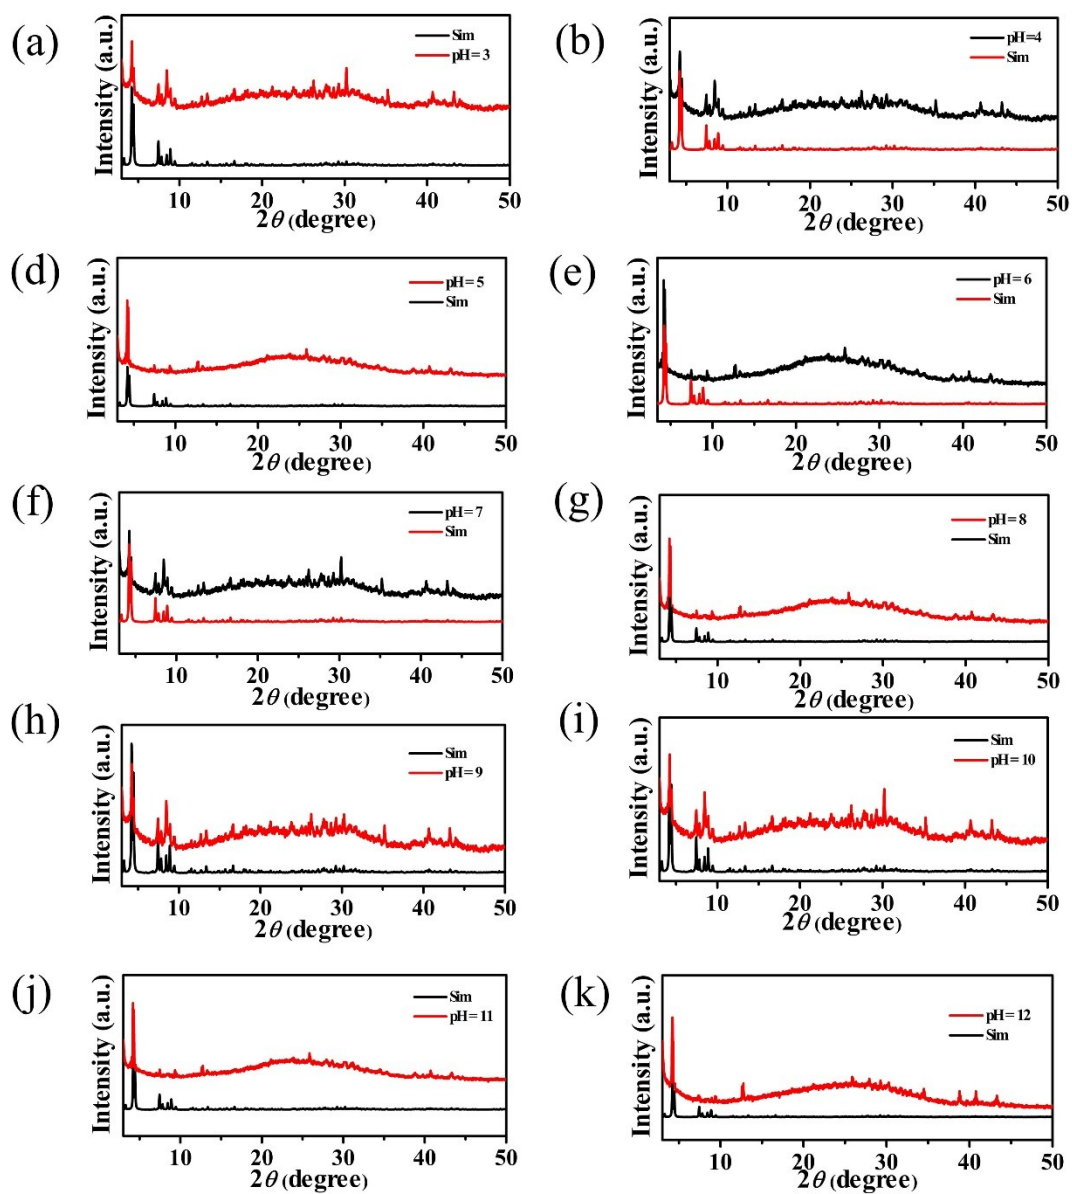

Figure S20. Variable-pH PXRD of compound  $\text{Eu}_{52.7}\text{Gd}_{7.3}$ .



## Section 7. Tables

**Table S7.** The selected bond lengths (Å) and bond angles (°) for **Eu<sub>52.7</sub>Gd<sub>7.3</sub>**.

|               |          |                 |           |
|---------------|----------|-----------------|-----------|
| Eu(1)-O(5)    | 2.323(8) | Eu(11)-O(22)    | 2.428(8)  |
| Eu(1)-O(3)    | 2.361(7) | Eu(11)-O(15A)   | 2.449(9)  |
| Eu(1)-O(1)    | 2.371(7) | Eu(11)-O(16A)   | 2.451(9)  |
| Eu(1)-O(6)    | 2.382(8) | Eu(11)-O(13A)   | 2.572(9)  |
| Eu(1)-O(4)    | 2.393(8) | Eu(11)-O(31A)   | 2.584(16) |
| Eu(1)-O(2)    | 2.421(8) | Eu(12)-O(33A)#1 | 2.312(9)  |
| Eu(1)-O(1B)#1 | 2.647(8) | Eu(12)-O(18A)   | 2.353(9)  |
| Eu(1)-O(2B)   | 2.669(8) | Eu(12)-O(15)    | 2.378(8)  |
| Eu(2)-O(9)    | 2.362(8) | Eu(12)-O(9A)    | 2.528(9)  |
| Eu(2)-O(10)   | 2.370(8) | Eu(13)-O(27A)   | 2.340(9)  |
| Eu(2)-O(12)   | 2.403(8) | Eu(13)-O(6A)    | 2.351(8)  |
| Eu(2)-O(8)    | 2.406(8) | Eu(13)-O(6)     | 2.381(8)  |
| Eu(2)-O(11)   | 2.409(8) | Eu(13)-O(14)    | 2.391(8)  |
| Eu(2)-O(7)    | 2.412(8) | Eu(13)-O(3)     | 2.422(7)  |
| Eu(2)-O(1A)   | 2.435(9) | Eu(13)-O(19A)   | 2.430(9)  |
| Eu(2)-O(4B)#2 | 2.501(8) | Eu(13)-O(20A)   | 2.460(9)  |
| Eu(3)-O(8)    | 2.365(8) | Eu(14)-O(10)    | 2.424(8)  |
| Eu(3)-O(13)   | 2.372(7) | Eu(14)-O(7A)    | 2.454(8)  |
| Eu(3)-O(14)   | 2.403(8) | Eu(14)-O(8A)    | 2.464(9)  |
| Eu(3)-O(3)    | 2.406(8) | Eu(14)-O(9)     | 2.476(8)  |
| Eu(3)-O(10)   | 2.413(8) | Eu(14)-O(35A)   | 2.532(9)  |
| Eu(3)-O(5A)   | 2.415(8) | Eu(14)-O(5A)    | 2.623(9)  |
| Eu(3)-O(2B)   | 2.454(8) | Eu(15)-O(30A)   | 2.231(13) |
| Eu(3)-O(4)    | 2.460(8) | Eu(15)-O(10A)   | 2.355(10) |
| Eu(4)-O(18)   | 2.359(8) | Eu(15)-O(18)    | 2.437(8)  |
| Eu(4)-O(16)#1 | 2.375(7) | Eu(15)-O(4A)    | 2.462(11) |
| Eu(4)-O(7)    | 2.384(8) | Eu(15)-O(1A)    | 2.533(9)  |
| Eu(4)-O(17)   | 2.394(8) | Gd(1)-O(5)      | 2.323(8)  |
| Eu(4)-O(12)   | 2.412(8) | Gd(1)-O(3)      | 2.361(7)  |
| Eu(4)-O(15)   | 2.425(8) | Gd(1)-O(1)      | 2.371(7)  |
| Eu(4)-O(9A)   | 2.451(8) | Gd(1)-O(6)      | 2.382(8)  |
| Eu(4)-O(6B)   | 2.456(8) | Gd(1)-O(4)      | 2.393(8)  |
| Eu(5)-O(16)   | 2.374(8) | Gd(2)-O(9)      | 2.362(8)  |

|                 |           |                |          |
|-----------------|-----------|----------------|----------|
| Eu(5)-O(15)#2   | 2.377(8)  | Gd(2)-O(10)    | 2.370(8) |
| Eu(5)-O(8)      | 2.390(8)  | Gd(2)-O(12)    | 2.403(8) |
| Eu(5)-O(4B)#2   | 2.648(8)  | Gd(2)-O(8)     | 2.406(8) |
| Eu(5)-O(3B)     | 2.686(8)  | Gd(2)-O(11)    | 2.409(8) |
| Eu(6)-O(20)     | 2.371(8)  | Gd(2)-O(1A)    | 2.435(9) |
| Eu(6)-O(23)     | 2.376(8)  | Gd(2)-O(4B)#2  | 2.501(8) |
| Eu(6)-O(20)#1   | 2.446(8)  | Gd(3)-O(8)     | 2.365(8) |
| Eu(6)-O(5B)#2   | 2.501(8)  | Gd(3)-O(13)    | 2.372(7) |
| Eu(7)-O(4)      | 2.352(8)  | Gd(3)-O(2B)    | 2.454(8) |
| Eu(7)-O(6)      | 2.367(8)  | Gd(3)-O(4)     | 2.460(8) |
| Eu(7)-O(16)#1   | 2.429(7)  | Gd(4)-O(18)    | 2.359(8) |
| Eu(7)-O(17A)    | 2.429(8)  | Gd(4)-O(16)#1  | 2.375(7) |
| Eu(7)-O(3B)#1   | 2.508(8)  | Gd(4)-O(7)     | 2.384(8) |
| Eu(8)-O(1)      | 2.358(7)  | Gd(4)-O(15)    | 2.425(8) |
| Eu(8)-O(5)#2    | 2.367(8)  | Gd(4)-O(9A)    | 2.451(8) |
| Eu(8)-O(2)      | 2.372(8)  | Gd(4)-O(6B)    | 2.456(8) |
| Eu(8)-O(1B)     | 2.565(8)  | Gd(5)-O(19)    | 2.351(8) |
| Eu(9)-O(22)     | 2.348(8)  | Gd(5)-O(16)    | 2.374(8) |
| Eu(9)-O(21)     | 2.349(8)  | Gd(5)-O(15)#2  | 2.377(8) |
| Eu(9)-O(18)     | 2.358(8)  | Gd(5)-O(8)     | 2.390(8) |
| Eu(9)-O(12)     | 2.376(8)  | Gd(5)-O(4B)#2  | 2.648(8) |
| Eu(9)-O(11)     | 2.380(8)  | Gd(5)-O(3B)    | 2.686(8) |
| Eu(9)-O(5B)#2   | 2.638(8)  | Gd(6)-O(20)    | 2.371(8) |
| Eu(9)-O(6B)     | 2.712(8)  | Gd(6)-O(23)    | 2.376(8) |
| Eu(10)-O(5)     | 2.335(8)  | Gd(6)-O(22)    | 2.384(8) |
| Eu(10)-O(22A)#2 | 2.378(9)  | Gd(6)-O(21)#2  | 2.399(8) |
| Eu(10)-O(26A)   | 2.405(9)  | Gd(6)-O(23)#2  | 2.412(8) |
| Eu(10)-O(24)#1  | 2.433(8)  | Gd(6)-O(13A)#2 | 2.442(8) |
| Eu(10)-O(23A)   | 2.458(8)  | Gd(6)-O(20)#1  | 2.446(8) |
| Eu(10)-O(24A)   | 2.465(9)  | Gd(6)-O(5B)#2  | 2.501(8) |
| Eu(10)-O(21A)   | 2.664(9)  | Gd(7)-O(4)     | 2.352(8) |
| Eu(11)-O(29A)   | 2.385(18) | Gd(7)-O(6)     | 2.367(8) |
| Eu(11)-O(21)    | 2.397(8)  | Gd(7)-O(17)    | 2.379(7) |
| Eu(11)-O(23)    | 2.398(8)  | Gd(7)-O(19)#1  | 2.382(8) |
| Eu(11)-O(14A)#2 | 2.404(9)  | Gd(7)-O(14)    | 2.412(7) |
| Gd(11)-O(14A)#2 | 2.404(9)  | Gd(7)-O(16)#1  | 2.429(7) |
| Gd(11)-O(22)    | 2.428(8)  | Gd(7)-O(17A)   | 2.429(8) |
| Gd(11)-O(15A)   | 2.449(9)  | Gd(7)-O(3B)#1  | 2.508(8) |

|                 |           |                     |            |
|-----------------|-----------|---------------------|------------|
| Gd(11)-O(31A)   | 2.584(16) | Gd(8)-O(1)          | 2.358(7)   |
| Gd(12)-O(33A)#1 | 2.312(9)  | Gd(8)-O(5)#2        | 2.367(8)   |
| Gd(12)-O(18A)   | 2.353(9)  | Gd(8)-O(2)          | 2.372(8)   |
| Gd(12)-O(15)    | 2.378(8)  | Gd(8)-O(24)#1       | 2.384(8)   |
| Gd(12)-O(17)    | 2.387(8)  | Gd(8)-O(24)         | 2.423(7)   |
| Gd(12)-O(12A)   | 2.387(11) | Gd(8)-O(21A)#2      | 2.429(9)   |
| Gd(12)-O(19)#1  | 2.415(8)  | Gd(8)-O(1)#2        | 2.460(7)   |
| Gd(12)-O(11A)   | 2.417(10) | Gd(8)-O(1B)         | 2.565(8)   |
| Gd(13)-O(27A)   | 2.340(9)  | Gd(9)-O(22)         | 2.348(8)   |
| Gd(13)-O(6A)    | 2.351(8)  | Gd(9)-O(21)         | 2.349(8)   |
| Gd(13)-O(6)     | 2.381(8)  | Gd(9)-O(18)         | 2.358(8)   |
| Gd(13)-O(14)    | 2.391(8)  | Gd(9)-O(12)         | 2.376(8)   |
| Gd(13)-O(3)     | 2.422(7)  | Gd(9)-O(11)         | 2.380(8)   |
| Gd(13)-O(19A)   | 2.430(9)  | Gd(9)-O(20)#1       | 2.386(8)   |
| Gd(13)-O(20A)   | 2.460(9)  | Gd(9)-O(5B)#2       | 2.638(8)   |
| Gd(13)-O(17A)   | 2.526(8)  | Gd(9)-O(6B)         | 2.712(8)   |
| Gd(14)-O(2A)    | 2.378(10) | Gd(10)-O(5)         | 2.335(8)   |
| Gd(14)-O(13)    | 2.394(8)  | Gd(10)-O(22A)#2     | 2.378(9)   |
| Gd(14)-O(10)    | 2.424(8)  | Gd(10)-O(26A)       | 2.405(9)   |
| Gd(14)-O(7A)    | 2.454(8)  | Gd(10)-O(24)#1      | 2.433(8)   |
| Gd(14)-O(8A)    | 2.464(9)  | Gd(10)-O(23A)       | 2.458(8)   |
| Gd(14)-O(9)     | 2.476(8)  | Gd(10)-O(24A)       | 2.465(9)   |
| Gd(14)-O(35A)   | 2.532(9)  | Gd(10)-O(25A)       | 2.520(9)   |
| Gd(14)-O(5A)    | 2.623(9)  | Gd(10)-O(2)         | 2.531(8)   |
| Gd(15)-O(30A)   | 2.231(13) | Gd(10)-O(21A)       | 2.664(9)   |
| Gd(15)-O(10A)   | 2.355(10) | Gd(11)-O(29A)       | 2.385(18)  |
|                 |           |                     |            |
| O(5)-Eu(1)-O(3) | 115.1(3)  | O(9)-Eu(2)-O(4B)#2  | 72.4(3)    |
| O(5)-Eu(1)-O(1) | 78.4(3)   | O(10)-Eu(2)-O(4B)#2 | 127.8(3)   |
| O(3)-Eu(1)-O(1) | 147.0(3)  | O(12)-Eu(2)-O(4B)#2 | 83.1(3)    |
| O(5)-Eu(1)-O(6) | 79.6(3)   | O(8)-Eu(2)-O(4B)#2  | 69.5(3)    |
| O(3)-Eu(1)-O(6) | 70.4(3)   | O(11)-Eu(2)-O(4B)#2 | 84.8(3)    |
| O(1)-Eu(1)-O(6) | 142.5(3)  | O(7)-Eu(2)-O(4B)#2  | 149.3(3)   |
| O(5)-Eu(1)-O(4) | 142.5(3)  | O(1A)-Eu(2)-O(4B)#2 | 125.3(3)   |
| O(3)-Eu(1)-O(4) | 78.7(3)   | O(9)-Eu(2)-Eu(5)    | 41.59(19)  |
| O(1)-Eu(1)-O(4) | 109.6(3)  | O(10)-Eu(2)-Eu(5)   | 79.64(19)  |
| O(6)-Eu(1)-O(4) | 72.6(3)   | O(12)-Eu(2)-Eu(5)   | 110.95(19) |
| O(5)-Eu(1)-O(2) | 71.6(3)   | O(8)-Eu(2)-Eu(5)    | 42.32(19)  |

|                       |            |                      |            |
|-----------------------|------------|----------------------|------------|
| O(3)-Eu(1)-O(2)       | 82.4(3)    | O(11)-Eu(2)-Eu(5)    | 129.91(19) |
| O(1)-Eu(1)-O(2)       | 73.4(3)    | O(7)-Eu(2)-Eu(5)     | 154.57(19) |
| O(6)-Eu(1)-O(2)       | 126.6(3)   | O(1A)-Eu(2)-Eu(5)    | 121.1(2)   |
| O(4)-Eu(1)-O(2)       | 145.8(3)   | O(4B)#2-Eu(2)-Eu(5)  | 48.37(18)  |
| O(5)-Eu(1)-O(1B)#1    | 66.2(3)    | O(9)-Eu(2)-Eu(15)    | 122.41(19) |
| O(3)-Eu(1)-O(1B)#1    | 146.0(2)   | O(10)-Eu(2)-Eu(15)   | 105.05(19) |
| O(1)-Eu(1)-O(1B)#1    | 66.6(2)    | O(12)-Eu(2)-Eu(15)   | 83.07(19)  |
| O(6)-Eu(1)-O(1B)#1    | 76.8(3)    | O(8)-Eu(2)-Eu(15)    | 156.18(19) |
| O(4)-Eu(1)-O(1B)#1    | 83.1(3)    | O(11)-Eu(2)-Eu(15)   | 40.69(19)  |
| O(2)-Eu(1)-O(1B)#1    | 126.0(3)   | O(7)-Eu(2)-Eu(15)    | 41.03(19)  |
| O(5)-Eu(1)-O(2B)      | 150.5(3)   | O(1A)-Eu(2)-Eu(15)   | 44.2(2)    |
| O(3)-Eu(1)-O(2B)      | 69.9(3)    | O(4B)#2-Eu(2)-Eu(15) | 125.45(18) |
| O(1)-Eu(1)-O(2B)      | 84.1(2)    | Eu(5)-Eu(2)-Eu(15)   | 161.41(2)  |
| O(6)-Eu(1)-O(2B)      | 126.8(3)   | O(9)-Eu(2)-Eu(9)     | 140.03(19) |
| O(4)-Eu(1)-O(2B)      | 66.1(3)    | O(10)-Eu(2)-Eu(9)    | 150.08(19) |
| O(2)-Eu(1)-O(2B)      | 80.8(3)    | O(12)-Eu(2)-Eu(9)    | 37.19(19)  |
| O(1B)#1-Eu(1)-O(2B)   | 127.2(3)   | O(8)-Eu(2)-Eu(9)     | 110.54(19) |
| O(5)-Eu(1)-Eu(3)      | 155.80(19) | O(11)-Eu(2)-Eu(9)    | 37.33(19)  |
| O(3)-Eu(1)-Eu(3)      | 41.89(19)  | O(7)-Eu(2)-Eu(9)     | 75.49(19)  |
| O(1)-Eu(1)-Eu(3)      | 124.71(18) | O(1A)-Eu(2)-Eu(9)    | 102.4(2)   |
| O(6)-Eu(1)-Eu(3)      | 83.58(19)  | O(4B)#2-Eu(2)-Eu(9)  | 74.54(18)  |
| O(4)-Eu(1)-Eu(3)      | 43.28(18)  | Eu(5)-Eu(2)-Eu(9)    | 120.80(2)  |
| O(2)-Eu(1)-Eu(3)      | 105.8(2)   | Eu(15)-Eu(2)-Eu(9)   | 63.140(18) |
| O(1B)#1-Eu(1)-Eu(3)   | 126.33(17) | O(9)-Eu(2)-Eu(3)     | 76.5(2)    |
| O(2B)-Eu(1)-Eu(3)     | 43.33(17)  | O(10)-Eu(2)-Eu(3)    | 35.11(19)  |
| O(5)-Eu(1)-Eu(8)#1    | 39.95(19)  | O(12)-Eu(2)-Eu(3)    | 95.6(2)    |
| O(3)-Eu(1)-Eu(8)#1    | 153.88(19) | O(8)-Eu(2)-Eu(3)     | 34.20(18)  |
| O(1)-Eu(1)-Eu(8)#1    | 42.42(18)  | O(11)-Eu(2)-Eu(3)    | 166.3(2)   |
| O(6)-Eu(1)-Eu(8)#1    | 104.29(19) | O(7)-Eu(2)-Eu(3)     | 93.72(19)  |
| O(4)-Eu(1)-Eu(8)#1    | 125.19(18) | O(1A)-Eu(2)-Eu(3)    | 116.2(2)   |
| O(2)-Eu(1)-Eu(8)#1    | 80.93(19)  | O(4B)#2-Eu(2)-Eu(3)  | 101.70(18) |
| O(1B)#1-Eu(1)-Eu(8)#1 | 45.09(17)  | Eu(5)-Eu(2)-Eu(3)    | 60.851(16) |
| O(2B)-Eu(1)-Eu(8)#1   | 126.42(17) | Eu(15)-Eu(2)-Eu(3)   | 132.03(2)  |
| Eu(3)-Eu(1)-Eu(8)#1   | 163.98(2)  | Eu(9)-Eu(2)-Eu(3)    | 132.56(2)  |
| O(5)-Eu(1)-Eu(8)      | 81.6(2)    | O(8)-Eu(3)-O(13)     | 72.4(3)    |
| O(3)-Eu(1)-Eu(8)      | 111.64(18) | O(8)-Eu(3)-O(14)     | 115.2(3)   |
| O(1)-Eu(1)-Eu(8)      | 37.64(18)  | O(13)-Eu(3)-O(14)    | 143.2(3)   |
| O(6)-Eu(1)-Eu(8)      | 159.8(2)   | O(8)-Eu(3)-O(3)      | 152.0(3)   |

|                     |            |                   |          |
|---------------------|------------|-------------------|----------|
| O(4)-Eu(1)-Eu(8)    | 127.63(18) | O(13)-Eu(3)-O(3)  | 120.9(3) |
| O(2)-Eu(1)-Eu(8)    | 38.28(18)  | O(14)-Eu(3)-O(3)  | 70.4(3)  |
| O(1B)#1-Eu(1)-Eu(8) | 102.26(17) | O(8)-Eu(3)-O(10)  | 68.4(3)  |
| O(2B)-Eu(1)-Eu(8)   | 70.13(17)  | O(13)-Eu(3)-O(10) | 73.1(3)  |
| Eu(3)-Eu(1)-Eu(8)   | 111.74(2)  | O(14)-Eu(3)-O(10) | 76.9(3)  |
| Eu(8)#1-Eu(1)-Eu(8) | 64.50(2)   | O(3)-Eu(3)-O(10)  | 137.0(3) |
| O(5)-Eu(1)-Eu(7)    | 108.7(2)   | O(8)-Eu(3)-O(5A)  | 128.5(3) |
| O(3)-Eu(1)-Eu(7)    | 78.48(18)  | O(13)-Eu(3)-O(5A) | 69.2(3)  |
| O(1)-Eu(1)-Eu(7)    | 127.65(18) | O(14)-Eu(3)-O(5A) | 80.3(3)  |
| O(6)-Eu(1)-Eu(7)    | 37.15(19)  | O(3)-Eu(3)-O(5A)  | 79.0(3)  |
| O(4)-Eu(1)-Eu(7)    | 36.84(18)  | O(10)-Eu(3)-O(5A) | 68.5(3)  |
| O(2)-Eu(1)-Eu(7)    | 158.91(18) | O(8)-Eu(3)-O(2B)  | 83.9(3)  |
| O(1B)#1-Eu(1)-Eu(7) | 69.80(17)  | O(13)-Eu(3)-O(2B) | 87.1(3)  |
| O(2B)-Eu(1)-Eu(7)   | 100.76(18) | O(14)-Eu(3)-O(2B) | 128.6(3) |
| Eu(3)-Eu(1)-Eu(7)   | 64.775(17) | O(3)-Eu(3)-O(2B)  | 73.0(3)  |
| Eu(8)#1-Eu(1)-Eu(7) | 113.37(2)  | O(10)-Eu(3)-O(2B) | 149.5(3) |
| Eu(8)-Eu(1)-Eu(7)   | 161.48(2)  | O(5A)-Eu(3)-O(2B) | 126.0(3) |
| O(9)-Eu(2)-O(10)    | 69.9(3)    | O(8)-Eu(3)-O(4)   | 80.4(3)  |
| O(9)-Eu(2)-O(12)    | 151.9(3)   | O(13)-Eu(3)-O(4)  | 145.2(3) |
| O(10)-Eu(2)-O(12)   | 118.2(3)   | O(14)-Eu(3)-O(4)  | 68.6(3)  |
| O(9)-Eu(2)-O(8)     | 78.0(3)    | O(3)-Eu(3)-O(4)   | 76.5(3)  |
| O(10)-Eu(2)-O(8)    | 68.4(3)    | O(10)-Eu(3)-O(4)  | 116.5(3) |
| O(12)-Eu(2)-O(8)    | 80.6(3)    | O(5A)-Eu(3)-O(4)  | 145.4(3) |
| O(9)-Eu(2)-O(11)    | 117.1(3)   | O(2B)-Eu(3)-O(4)  | 68.6(3)  |
| O(10)-Eu(2)-O(11)   | 144.9(3)   | O(5)-Gd(1)-O(3)   | 115.1(3) |
| O(12)-Eu(2)-O(11)   | 73.0(3)    | O(5)-Gd(1)-O(1)   | 78.4(3)  |
| O(8)-Eu(2)-O(11)    | 145.2(3)   | O(3)-Gd(1)-O(1)   | 147.0(3) |
| O(9)-Eu(2)-O(7)     | 137.6(3)   | O(5)-Gd(1)-O(6)   | 79.6(3)  |
| O(10)-Eu(2)-O(7)    | 78.6(3)    | O(3)-Gd(1)-O(6)   | 70.4(3)  |
| O(12)-Eu(2)-O(7)    | 69.0(3)    | O(1)-Gd(1)-O(6)   | 142.5(3) |
| O(8)-Eu(2)-O(7)     | 116.1(3)   | O(5)-Gd(1)-O(4)   | 142.5(3) |
| O(11)-Eu(2)-O(7)    | 75.2(3)    | O(3)-Gd(1)-O(4)   | 78.7(3)  |
| O(7)-Eu(2)-O(1A)    | 68.0(3)    | O(6)-Gd(1)-O(2)   | 126.6(3) |

---

**Table S8.** The selected bond lengths (Å) and bond angles (°) for **Eu<sub>52.8</sub>Tb<sub>7.2</sub>**.

|               |           |               |            |
|---------------|-----------|---------------|------------|
| Eu(1)-O(20)   | 2.360(9)  | Tb(4)-O(4)    | 2.384(10)  |
| Eu(1)-O(7)    | 2.360(9)  | Tb(4)-O(8)    | 2.394(9)   |
| Eu(1)-O(18)   | 2.374(9)  | Tb(4)-O(23)   | 2.417(9)   |
| Eu(1)-O(8)    | 2.391(9)  | Tb(4)-O(11)   | 2.421(10)  |
| Eu(1)-O(2)    | 2.405(9)  | Tb(4)-O(1B)   | 2.458(9)   |
| Eu(1)-O(16)   | 2.418(9)  | Tb(4)-O(19A)  | 2.466(10)  |
| Eu(1)-O(11A)  | 2.444(10) | Tb(5)-O(6)#2  | 2.362(9)   |
| Eu(1)-O(6B)   | 2.515(10) | Tb(5)-O(20)   | 2.370(9)   |
| Eu(2)-O(12)   | 2.311(9)  | Tb(5)-O(19)   | 2.373(10)  |
| Eu(2)-O(17)   | 2.357(9)  | Tb(5)-O(11)   | 2.373(10)  |
| Eu(2)-O(5)#1  | 2.366(9)  | Tb(5)-O(16)   | 2.383(9)   |
| Eu(2)-O(7)    | 2.367(10) | Tb(5)-O(3B)   | 2.647(9)   |
| Eu(2)-O(18)   | 2.375(10) | Tb(5)-O(6B)   | 2.709(10)  |
| Eu(2)-O(1)#1  | 2.417(9)  | Tb(5)-Tb(13)  | 3.8976(11) |
| Eu(2)-O(5B)   | 2.645(10) | Tb(6)-O(5)    | 2.362(9)   |
| Eu(2)-O(4B)   | 2.656(10) | Tb(6)-O(1)    | 2.373(9)   |
| Eu(3)-O(9)    | 2.372(9)  | Tb(6)-O(24)   | 2.377(9)   |
| Eu(3)-O(21)#1 | 2.380(10) | Tb(6)-O(12)   | 2.380(9)   |
| Eu(3)-O(14)   | 2.406(10) | Tb(6)-O(24)#1 | 2.408(9)   |
| Eu(3)-O(23)   | 2.410(9)  | Tb(6)-O(3A)   | 2.420(10)  |
| Eu(3)-O(4)    | 2.423(10) | Tb(6)-O(5)#1  | 2.465(10)  |
| Eu(3)-O(19)#1 | 2.426(9)  | Tb(6)-O(5B)   | 2.577(10)  |
| Eu(3)-O(21A)  | 2.454(10) | Tb(7)-O(15)   | 2.381(10)  |
| Eu(3)-O(3B)#1 | 2.504(9)  | Tb(7)-O(13)   | 2.381(10)  |
| Eu(4)-O(22)   | 2.340(10) | Tb(7)-O(3)    | 2.385(9)   |
| Eu(4)-O(16)   | 2.378(9)  | Tb(7)-O(13)#1 | 2.429(10)  |
| Eu(4)-O(4)    | 2.384(10) | Tb(7)-O(3)#2  | 2.442(9)   |
| Eu(4)-O(8)    | 2.394(9)  | Tb(7)-O(7A)   | 2.460(9)   |
| Eu(4)-O(23)   | 2.417(9)  | Tb(7)-O(2B)   | 2.517(10)  |
| Eu(4)-O(11)   | 2.421(10) | Tb(8)-O(2)    | 2.388(9)   |
| Eu(4)-O(1B)   | 2.458(9)  | Tb(8)-O(17)   | 2.405(9)   |
| Eu(4)-O(19A)  | 2.466(10) | Tb(8)-O(9)    | 2.417(9)   |
| Eu(5)-O(21)   | 2.362(9)  | Tb(8)-O(15A)  | 2.419(10)  |
| Eu(5)-O(6)#2  | 2.362(9)  | Tb(8)-O(7)    | 2.457(10)  |
| Eu(5)-O(20)   | 2.370(9)  | Tb(8)-O(4B)   | 2.464(9)   |
| Eu(5)-O(19)   | 2.373(10) | Tb(9)-O(28A)  | 2.400(11)  |

|               |            |                |           |
|---------------|------------|----------------|-----------|
| Eu(5)-O(11)   | 2.373(10)  | Tb(9)-O(24)#1  | 2.431(9)  |
| Eu(5)-O(16)   | 2.383(9)   | Tb(9)-O(2A)    | 2.458(11) |
| Eu(5)-O(3B)   | 2.647(9)   | Tb(9)-O(1A)    | 2.474(11) |
| Eu(5)-O(6B)   | 2.709(10)  | Tb(9)-O(25A)   | 2.511(11) |
| Eu(6)-O(5)    | 2.362(9)   | Tb(9)-O(1)#1   | 2.532(10) |
| Eu(6)-O(1)    | 2.373(9)   | Tb(9)-O(3A)    | 2.659(10) |
| Eu(6)-O(24)   | 2.377(9)   | Tb(10)-O(22)   | 2.349(11) |
| Eu(6)-O(12)   | 2.380(9)   | Tb(10)-O(10)   | 2.353(9)  |
| Eu(6)-O(24)#1 | 2.408(9)   | Tb(10)-O(15)   | 2.357(10) |
| Eu(6)-O(3A)   | 2.420(10)  | Tb(10)-O(23)   | 2.370(9)  |
| Eu(6)-O(5)#1  | 2.465(10)  | Tb(10)-O(14)   | 2.373(9)  |
| Eu(6)-O(5B)   | 2.577(10)  | Tb(10)-O(3)    | 2.392(10) |
| Eu(7)-O(15)   | 2.381(10)  | Tb(10)-O(2B)#1 | 2.647(11) |
| Eu(7)-O(13)   | 2.381(10)  | Tb(10)-O(1B)   | 2.743(9)  |
| Eu(7)-O(3)    | 2.385(9)   | Tb(11)-O(8A)   | 2.396(11) |
| Eu(7)-O(13)#1 | 2.429(10)  | Tb(11)-O(13)#1 | 2.398(10) |
| Eu(7)-O(3)#2  | 2.442(9)   | Tb(11)-O(15)   | 2.401(10) |
| Eu(7)-O(7A)   | 2.460(9)   | Tb(11)-O(10)   | 2.428(9)  |
| Eu(7)-O(2B)   | 2.517(10)  | Tb(11)-O(6A)   | 2.430(11) |
| Eu(8)-O(19)#1 | 2.352(10)  | Tb(11)-O(5A)   | 2.463(11) |
| Eu(8)-O(6)    | 2.383(9)   | Tb(11)-O(36A)  | 2.574(17) |
| Eu(8)-O(2)    | 2.388(9)   | Tb(11)-O(7A)   | 2.577(11) |
| Eu(8)-O(17)   | 2.405(9)   | Tb(12)-O(31A)  | 2.360(11) |
| Eu(8)-O(9)    | 2.417(9)   | Tb(12)-O(23A)  | 2.381(13) |
| Eu(8)-O(15A)  | 2.419(10)  | Tb(12)-O(6)    | 2.412(9)  |
| Eu(8)-O(7)    | 2.457(10)  | Tb(12)-O(9)    | 2.416(9)  |
| Eu(8)-O(4B)   | 2.464(9)   | Tb(12)-O(13A)  | 2.463(10) |
| Eu(8)-Eu(12)  | 3.6811(10) | Tb(12)-O(14A)  | 2.463(11) |
| Eu(8)-Eu(14)  | 3.8939(10) | Tb(12)-O(21)#1 | 2.479(10) |
| Eu(9)-O(12)   | 2.336(9)   | Tb(12)-O(30A)  | 2.530(11) |
| Eu(9)-O(4A)   | 2.373(10)  | Tb(12)-O(15A)  | 2.634(11) |
| Eu(9)-O(28A)  | 2.400(11)  | Tb(13)-O(29A)  | 2.325(11) |
| Eu(9)-O(24)#1 | 2.431(9)   | Tb(13)-O(12A)  | 2.373(11) |
| Eu(9)-O(2A)   | 2.458(11)  | Tb(13)-O(11)   | 2.380(10) |
| Eu(9)-O(1A)   | 2.474(11)  | Tb(13)-O(8)    | 2.389(9)  |
| Eu(9)-O(25A)  | 2.511(11)  | Tb(13)-O(18A)  | 2.416(14) |
| Eu(9)-O(1)#1  | 2.532(10)  | Tb(13)-O(20)   | 2.429(10) |
| Eu(9)-O(3A)   | 2.659(10)  | Tb(13)-O(17A)  | 2.436(12) |



|                    |           |                       |           |
|--------------------|-----------|-----------------------|-----------|
| Eu(14)-O(2)        | 2.390(9)  | Tb(13)-O(19A)         | 2.530(11) |
| Eu(14)-O(9A)       | 2.418(11) | Tb(14)-O(27A)         | 2.341(11) |
| Eu(14)-O(17)       | 2.420(9)  | Tb(14)-O(16A)         | 2.365(11) |
| Eu(14)-O(10A)      | 2.462(12) | Tb(14)-O(18)          | 2.382(9)  |
| Eu(14)-O(11A)      | 2.533(10) | Tb(14)-O(2)           | 2.390(9)  |
| Eu(15)-O(33A)      | 2.210(17) | Tb(14)-O(9A)          | 2.418(11) |
| Eu(15)-O(20A)      | 2.361(12) | Tb(14)-O(17)          | 2.420(9)  |
| Eu(15)-O(14)       | 2.369(10) | Tb(14)-O(10A)         | 2.462(12) |
| Eu(15)-O(4)        | 2.404(10) | Tb(14)-O(11A)         | 2.533(10) |
| Eu(15)-O(24A)      | 2.409(16) | Tb(15)-O(33A)         | 2.210(17) |
| Eu(15)-O(22)       | 2.446(11) | Tb(15)-O(20A)         | 2.361(12) |
| Eu(15)-O(22A)      | 2.488(13) | Tb(15)-O(14)          | 2.369(10) |
| Eu(15)-O(21A)      | 2.532(11) | Tb(15)-O(4)           | 2.404(10) |
| Tb(1)-O(20)        | 2.360(9)  | Tb(15)-O(24A)         | 2.409(16) |
| Tb(1)-O(7)         | 2.360(9)  | Tb(15)-O(22)          | 2.446(11) |
| Tb(1)-O(18)        | 2.374(9)  | Tb(15)-O(22A)         | 2.488(13) |
| Tb(1)-O(8)         | 2.391(9)  | Tb(15)-O(21A)         | 2.532(11) |
|                    |           |                       |           |
| O(20)-Eu(1)-O(7)   | 152.7(3)  | O(4)-Tb(3)-O(3B)#1    | 149.4(3)  |
| O(20)-Eu(1)-O(18)  | 118.2(3)  | O(19)#1-Tb(3)-O(3B)#1 | 69.5(3)   |
| O(7)-Eu(1)-O(18)   | 72.8(3)   | O(21A)-Tb(3)-O(3B)#1  | 125.7(4)  |
| O(20)-Eu(1)-O(8)   | 70.2(3)   | O(22)-Tb(4)-O(16)     | 150.7(3)  |
| O(7)-Eu(1)-O(8)    | 117.4(3)  | O(22)-Tb(4)-O(4)      | 70.6(3)   |
| O(18)-Eu(1)-O(8)   | 143.1(3)  | O(16)-Tb(4)-O(4)      | 117.2(3)  |
| O(20)-Eu(1)-O(2)   | 135.8(3)  | O(22)-Tb(4)-O(8)      | 137.1(3)  |
| O(7)-Eu(1)-O(2)    | 69.6(3)   | O(16)-Tb(4)-O(8)      | 69.6(3)   |
| O(18)-Eu(1)-O(2)   | 74.9(3)   | O(4)-Tb(4)-O(8)       | 75.6(3)   |
| O(8)-Eu(1)-O(2)    | 76.4(3)   | O(22)-Tb(4)-O(23)     | 76.0(3)   |
| O(20)-Eu(1)-O(16)  | 77.2(3)   | O(16)-Tb(4)-O(23)     | 80.7(3)   |
| O(7)-Eu(1)-O(16)   | 81.5(3)   | O(4)-Tb(4)-O(23)      | 69.6(3)   |
| O(18)-Eu(1)-O(16)  | 146.0(3)  | O(8)-Tb(4)-O(23)      | 115.8(3)  |
| O(8)-Eu(1)-O(16)   | 69.0(3)   | O(22)-Tb(4)-O(11)     | 119.9(3)  |
| O(2)-Eu(1)-O(16)   | 116.7(3)  | O(16)-Tb(4)-O(11)     | 72.6(3)   |
| O(20)-Eu(1)-O(11A) | 78.2(3)   | O(4)-Tb(4)-O(11)      | 142.4(3)  |
| O(7)-Eu(1)-O(11A)  | 128.1(3)  | O(8)-Tb(4)-O(11)      | 74.8(3)   |
| O(18)-Eu(1)-O(11A) | 68.5(3)   | O(23)-Tb(4)-O(11)     | 145.6(3)  |
| O(8)-Eu(1)-O(11A)  | 79.5(3)   | O(22)-Tb(4)-O(1B)     | 73.0(3)   |
| O(2)-Eu(1)-O(11A)  | 67.9(3)   | O(16)-Tb(4)-O(1B)     | 82.6(3)   |
| O(16)-Eu(1)-O(11A) | 145.0(3)  | O(4)-Tb(4)-O(1B)      | 130.7(3)  |
| O(20)-Eu(1)-O(6B)  | 73.8(3)   | O(8)-Tb(4)-O(1B)      | 149.4(3)  |
| O(7)-Eu(1)-O(6B)   | 83.1(3)   | O(23)-Tb(4)-O(1B)     | 70.1(3)   |

|                    |          |                    |          |
|--------------------|----------|--------------------|----------|
| O(18)-Eu(1)-O(6B)  | 84.5(3)  | O(11)-Tb(4)-O(1B)  | 85.1(3)  |
| O(8)-Eu(1)-O(6B)   | 130.3(3) | O(22)-Tb(4)-O(19A) | 80.6(4)  |
| O(2)-Eu(1)-O(6B)   | 149.6(3) | O(16)-Tb(4)-O(19A) | 127.8(3) |
| O(16)-Eu(1)-O(6B)  | 70.4(3)  | O(4)-Tb(4)-O(19A)  | 78.9(3)  |
| O(11A)-Eu(1)-O(6B) | 124.9(3) | O(8)-Tb(4)-O(19A)  | 67.5(3)  |
| O(12)-Eu(2)-O(17)  | 115.0(3) | O(23)-Tb(4)-O(19A) | 145.5(3) |
| O(12)-Eu(2)-O(5)#1 | 78.6(3)  | O(11)-Tb(4)-O(19A) | 68.6(3)  |
| O(17)-Eu(2)-O(5)#1 | 147.2(3) | O(1B)-Tb(4)-O(19A) | 126.0(4) |
| O(12)-Eu(2)-O(7)   | 142.7(3) | O(21)-Tb(5)-O(6)#2 | 72.6(3)  |
| O(17)-Eu(2)-O(7)   | 78.4(3)  | O(21)-Tb(5)-O(20)  | 114.6(3) |
| O(5)#1-Eu(2)-O(7)  | 109.6(3) | O(6)#2-Tb(5)-O(20) | 82.8(3)  |
| O(12)-Eu(2)-O(18)  | 79.5(3)  | O(21)-Tb(5)-O(19)  | 78.9(3)  |
| O(17)-Eu(2)-O(18)  | 70.2(3)  | O(6)#2-Tb(5)-O(19) | 72.0(3)  |
| O(5)#1-Eu(2)-O(18) | 142.5(3) | O(20)-Tb(5)-O(19)  | 146.6(3) |
| O(7)-Eu(2)-O(18)   | 72.6(3)  | O(21)-Tb(5)-O(11)  | 81.9(4)  |

---

## Supplementary References

- (1) C. Cui, W. W. Ju, X. M. Luo, Q. F. Lin, J. P. Cao and Y. Xu, A Series of Lanthanide Compounds Constructed from  $\text{Ln}_8$  Rings Exhibiting Large Magnetocaloric Effect and Interesting Luminescence, *Inorg. Chem.*, 2018, **57**, 8608-6814.
- (2) D. Zhang, Y. Lu, D. R. Zhu and Y. Xu,  $(\text{C}_4\text{N}_2\text{H}_{12})_3[\text{Ln}_3(\text{OH})(\text{SO}_4)_7]$  ( $\text{Ln} = \text{Sm}, \text{Eu},$  and  $\text{Tb}$ ): A Series of Honeycomb-like Open-Framework Lanthanide Sulfates with Extra-Large Channels Containing 24-Membered Rings, *Inorg. Chem.*, 2013, **52**, 3253-3258.
- (3) K. H. Zangana, E. M. Pineda, J. Schnack and R. E. P. Winpenny, Octametallic 4f-phosphonate horseshoes, *Dalton Trans.*, 2013, **42**, 14045-14048.
